# Supplementary material for: Amorphicity and Aerosolization of Soluplus-Based Inhalable Spray Dried Powders
Source: MDPI journal article supplement (doi:10.3390/pharmaceutics14122618), 2022-11-27
Supplement: s1 [file s1]

# Supplementary Materials: Amorphicity and aerosolization of soluplus-based inhalable spray dried powders

Bishal Raj Adhikari and Shyamal C. Das

Tables

**Table S1.** Linearity and accuracy of the chromatographic method used.

| Linearity                                                     |           |                                                                            |                              |              |
|---------------------------------------------------------------|-----------|----------------------------------------------------------------------------|------------------------------|--------------|
| Concentration (µg/mL)                                         | Peak Area | Equation of regression                                                     | Correlation coefficient (R²) |              |
| 100                                                           | 20180330  | y = 20171x - 8529.5<br>where,<br>y = peak area<br>x= concentration (µg/mL) | 0.999                        |              |
| 50                                                            | 10094430  |                                                                            |                              |              |
| 25                                                            | 5051480   |                                                                            |                              |              |
| 12.5                                                          | 2530005   |                                                                            |                              |              |
| 6.25                                                          | 1269267   |                                                                            |                              |              |
| 3.12                                                          | 637890    |                                                                            |                              |              |
| 1.50                                                          | 311107    |                                                                            |                              |              |
| 0.75                                                          | 157801    |                                                                            |                              |              |
| 0.40                                                          | 89217     |                                                                            |                              |              |
| Accuracy                                                      |           |                                                                            |                              |              |
| Sample                                                        | Area      | Strength of sample (calculated)                                            | Strength of sample (taken)   | Recovery (%) |
| 1                                                             | 1718413   | 81.40                                                                      | 83.00                        | 98.1         |
| 2                                                             | 487956    | 23.08                                                                      | 23.50                        | 98.2         |
| 3                                                             | 19728     | 0.89                                                                       | 0.90                         | 98.9         |
| Mean                                                          |           |                                                                            |                              | 98.4         |
| Standard deviation (%)                                        |           |                                                                            |                              | 0.4          |
| Relative Standard Deviation (RSD) or Coefficient of variation |           |                                                                            |                              | 0.4          |

**Table S2.** Aerosol performance of the various spray-dried formulations (4% salbutamol/96% soluplus (4SS\_96Solu\_SD), 4% salbutamol/86% soluplus/10% leucine (4SS\_86Solu\_10Leu\_SD), and 4% salbutamol/76% soluplus/20% leucine (4SS\_76Solu\_20Leu\_SD). RF, EF, and FPF represent recovery fraction, emitted fraction and fine particle fraction, respectively.

| Formulation        | RF (%)     | EF (%)     | FPF (%)    |
|--------------------|------------|------------|------------|
| SS_96Solu_SD       | 96.5 ± 2.9 | 91.9 ± 0.6 | 49.8 ± 2.0 |
| SS_86Solu_10Leu_SD | 90.3 ± 2.2 | 91.6 ± 2.6 | 48.3 ± 0.8 |
| SS_76Solu_20Leu_SD | 86.2 ± 1.4 | 89.3 ± 0.4 | 69.7 ± 6.6 |

Figures

A

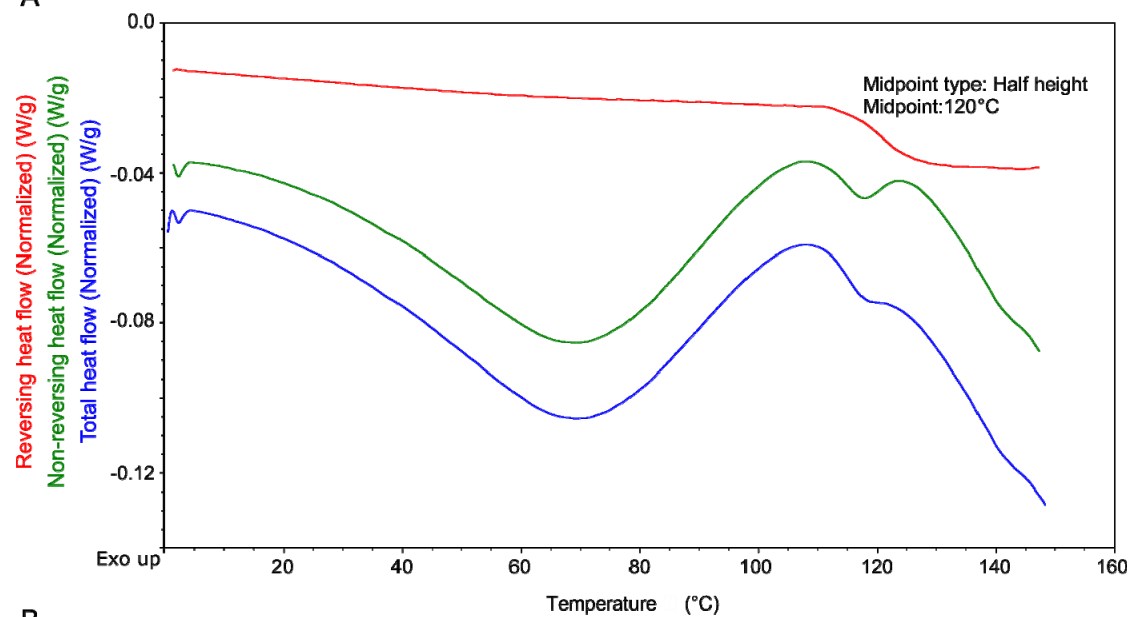

B

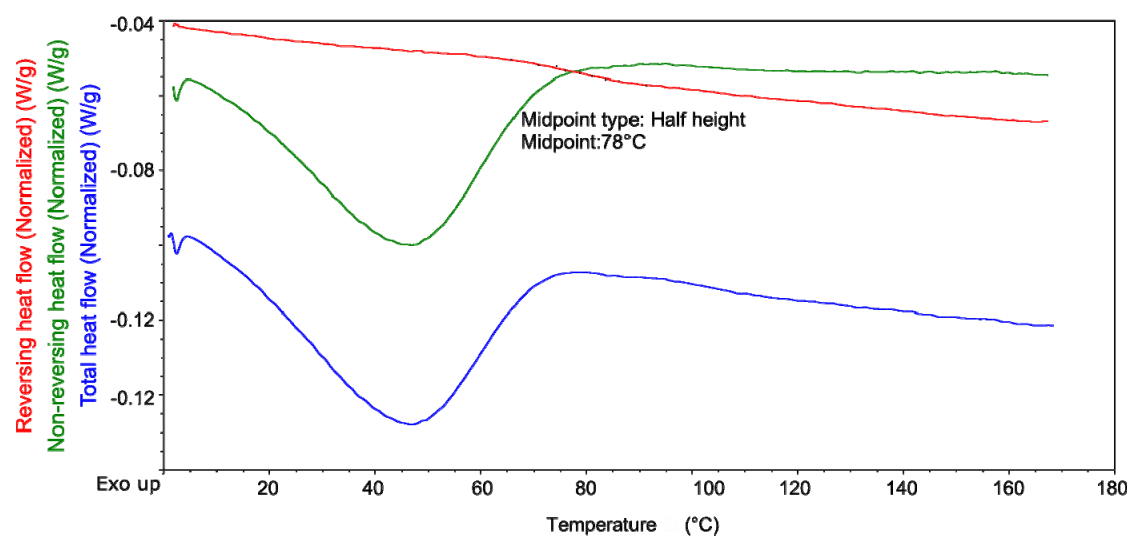

Figure S1. DSC thermograms of (A) spray-dried salbutamol sulphate and (B) soluplus.

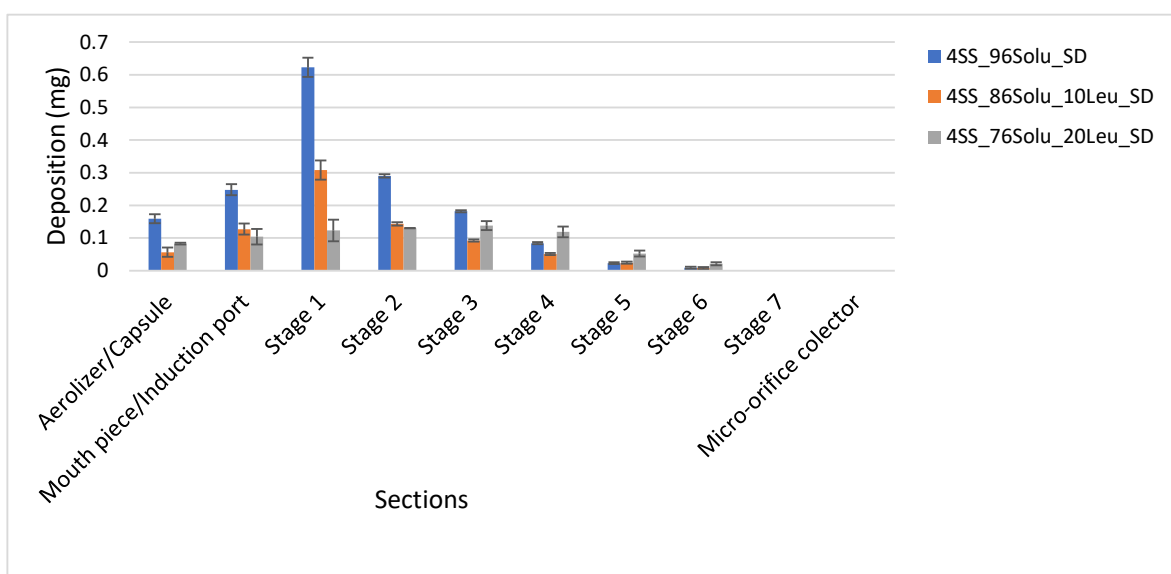

**Figure S2.** Deposition behavior of different formulations 4% salbutamol/96% soluplus (4SS\_96Solu\_SD), 4% salbutamol/86% soluplus/10% leucine (4SS\_86Solu\_10Leu\_SD), and 4% salbutamol/76% soluplus/20% leucine (4SS\_76Solu\_20Leu\_SD) on various sections of next generation impactor (60 L/min) during in-vitro aerosolization assessment.
